# Supplementary material
Source: Springer Nature journal article supplement (https://www.springermedizin.de/resource/supplementary/12936_2010_1341_MOESM1_ESM.pdf/9549568)

### a. Thai patients

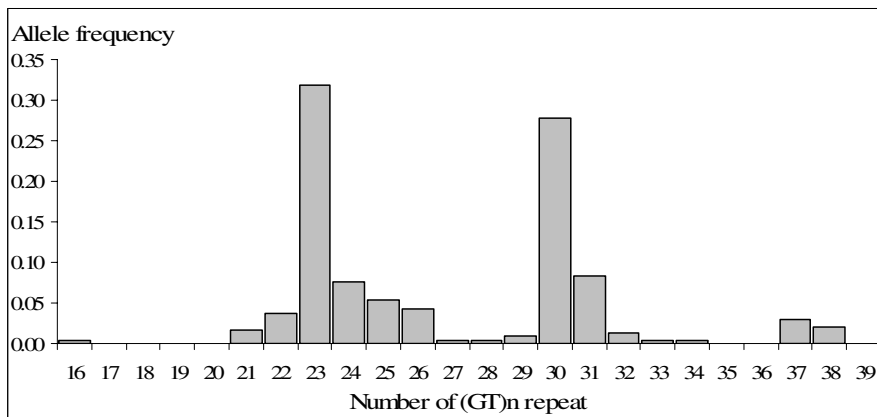

### b. Burmese patients

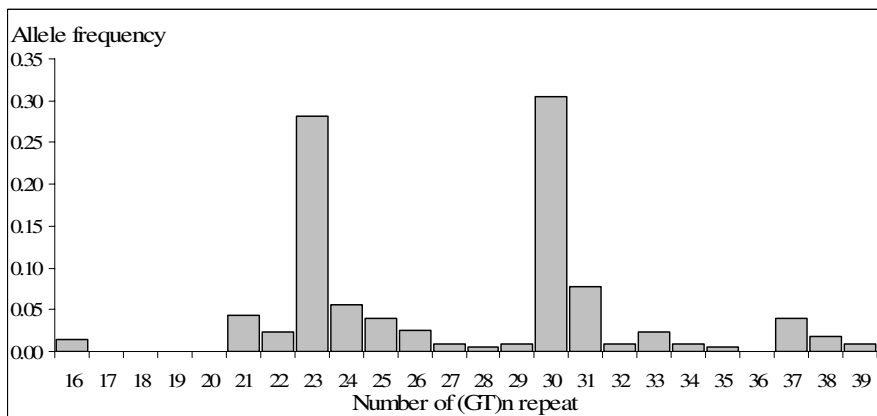

### c. Karen patients

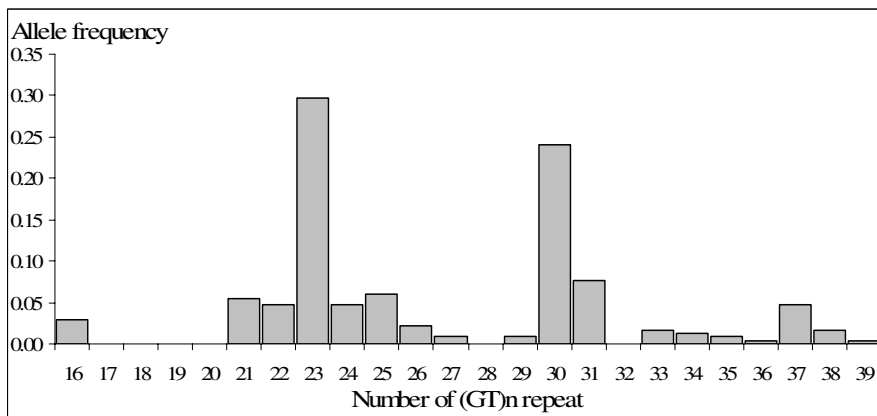

Supplement: MOESM1 [file 9549568]
